# Supplementary material for: New model for aspartic acid species in aqueous calcium carbonate growth environments: challenges and perspectives
Source: Royal Society of Chemistry journal article supplement (doi:10.1039/d3cp04674e), 2023-12-29
Supplement: d3cp04674e3.pdf [file d3cp04674e3.pdf]

## Supplementary Information

# New model of aspartic acid species in aqueous calcium carbonate growth environments: challenges and perspectives

Alicia Schuitemaker,<sup>a,b,c</sup> Katarzyna B. Koziara,<sup>c</sup> Paolo Raiteri,<sup>c</sup> Julian D. Gale,<sup>c</sup> and Raffaella Demichelis<sup>\*c</sup>

Received Xth XXXXXXXXXXXX 20XX, Accepted Xth XXXXXXXXXXXX 20XX

First published on the web Xth XXXXXXXXXXXX 200X

DOI: 10.1039/b000000x

### 1 Force field

Atoms are labelled as in Figure 1 with water oxygen and hydrogen atoms labelled as H2 and O2, respectively. Parameters for water and calcium carbonate are reported in Raiteri *et al.*<sup>1</sup> and in Wu *et al.*<sup>2</sup>. Charges, intra- and inter-molecular parameters for aspartic acid species are reported in Tables 1, 2, 3, and 4.

The energy of intra-molecular bonds ( $E_{bond}$ ), angles ( $E_{angles}$ ), dihedral angles ( $E_{dihedrals}$ ), and improper angles ( $E_{improper}$ ) for aspartic acid species is defined as follows:

$$E_{bond} = K(r - r_0)^2 \quad (1)$$

$$E_{angle} = K(\theta - \theta_0)^2 \quad (2)$$

$$E_{dihedral} = K[1 + \cos(n\phi - d)] \quad (3)$$

$$E_{improper} = K_2d^2 + K_4d^4 \quad (4)$$

Van der Waals interactions between calcium and aspartic acid species are modelled through either a Lennard-Jones potential in its  $AB$  form,  $E_{LJ-AB}$ , or a Buckingham potential,  $E_B$ :

$$E_{LJ-AB} = \frac{A}{r^{12}} - \frac{B}{r^6} \quad (5)$$

$$E_B = A \cdot e^{-\frac{r}{\rho}} - \frac{C}{r^6} \quad (6)$$

All other van der Waals interactions are described with a Lennard-Jones potential,  $E_{LJ}$ :

$$E_{LJ} = 4\epsilon \left[ \left( \frac{\sigma}{r} \right)^{12} - \left( \frac{\sigma}{r} \right)^6 \right] \quad (7)$$

All Coulomb and van der Waals interactions have a cutoff radius at 9.0 Å; all van der Waals interactions except from those between aspartic acid species and water have a tapering function from 6.0 Å. 1-4 intra-molecular interactions are considered for 12-6 Lennard-Jones (weighting 0.5) and Coulomb (weighting 1.0) terms.

<sup>a</sup> Australian Research Council Centre of Excellence in Exciton Science, School of Chemistry, University of Sydney, Sydney, New South Wales, Australia

<sup>b</sup> The University of Sydney Nano Institute, University of Sydney, Sydney, New South Wales, Australia

<sup>c</sup> School of Molecular and Life Sciences, Curtin University, GPO Box U1987, 6845 Perth, Western Australia, Australia; raffaella.demichelis@curtin.edu.au

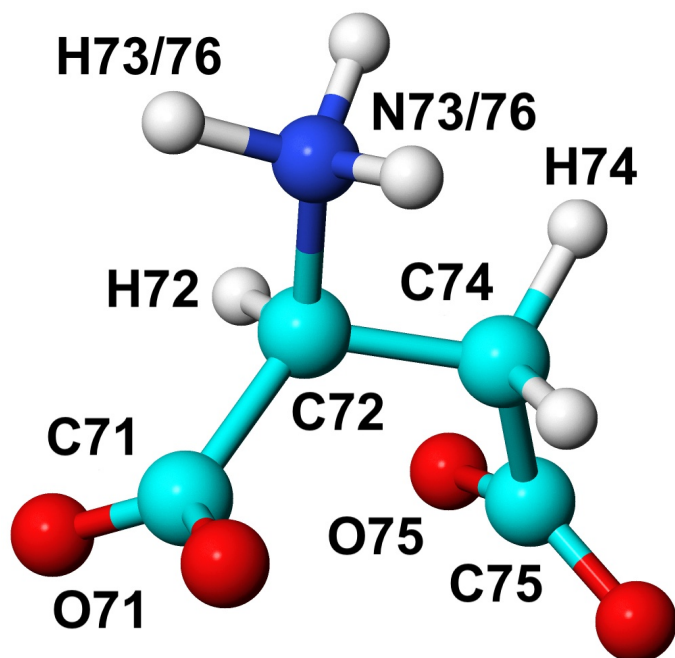

**Fig. 1** Ball and stick representation of L-Asp  $ZW^-$ . O atoms are coloured in red, C atoms in cyan, H atoms in white and N is coloured in blue. Labels correspond to the atom types as defined in the force field. Labels 73 and 76 refer to the amino group in Asp  $ZW^-$  and in Asp $^{2-}$ , respectively.

**Table 1** Force field charges. Labels as in Figure 1

| Atom Type | Partial charges, $ e $ |
|-----------|------------------------|
| C71       | 0.499000               |
| O71       | -0.702000              |
| C72       | 0.198000               |
| H72       | 0.024000               |
| N73       | -0.449000              |
| H73       | 0.326000               |
| N76       | -0.923000              |
| H76       | 0.226000               |
| C74       | -0.241000              |
| H74       | 0.070000               |
| C75       | 0.715000               |
| O75       | -0.730000              |

**Table 2** Intra-molecular interactions for aspartic acid species. Parameters as in equations 1 to 4. Labels as in Figure 1

| bond    | $K$ [eV Å <sup>-2</sup> ] | $r$ [Å]   | improper              | $K_2$ [eV Å <sup>-2</sup> ] | $K_4$ [eV Å <sup>-4</sup> ] |
|---------|---------------------------|-----------|-----------------------|-----------------------------|-----------------------------|
| C72-H72 | 15.618400                 | 1.0963000 | C71 - C72 - O71 - O71 | 8.35870000                  | 360                         |
| C74-H74 | 15.618400                 | 1.0963000 | C75 - C74 - O75 - O75 | 8.35870000                  | 360                         |
| C71-O71 | 24.765100                 | 1.2516000 |                       |                             |                             |
| C75-O75 | 24.765100                 | 1.2516000 |                       |                             |                             |
| C72-N73 | 13.162300                 | 1.4658000 |                       |                             |                             |
| N73-H73 | 20.528750                 | 1.0250000 |                       |                             |                             |
| C72-N76 | 13.162300                 | 1.4658000 |                       |                             |                             |
| N76-H76 | 20.528750                 | 1.0250000 |                       |                             |                             |
| C71-C72 | 11.482000                 | 1.5100000 |                       |                             |                             |
| C74-C75 | 11.482000                 | 1.5650000 |                       |                             |                             |
| C72-C74 | 7.899100                  | 1.5300000 |                       |                             |                             |

  

| angle           | $K$ [eV ° <sup>-2</sup> ] | $r$ [°]   | dihedral              | $K$ [eV]   | n | d [°] | weighting |
|-----------------|---------------------------|-----------|-----------------------|------------|---|-------|-----------|
| C71 - C72 - N73 | 1.5441000                 | 114.70000 | N73 - C72 - C74 - C75 | 0.00005403 | 6 | 180   | 0.0       |
| C71 - C72 - N76 | 1.5441000                 | 114.70000 | N76 - C72 - C74 - C75 | 0.00005403 | 6 | 180   | 0.0       |
| C71 - C72 - H72 | 1.9992000                 | 109.26000 | H74 - C74 - C72 - C71 | 0.00703640 | 3 | 360   | 0.0       |
| C71 - C72 - C74 | 1.5441000                 | 114.33000 | C75 - C74 - C72 - C71 | 0.00703640 | 3 | 360   | 0.0       |
| O71 - C71 - C72 | 2.8160500                 | 115.04000 | H74 - C74 - C72 - H72 | 0.00703640 | 3 | 360   | 0.0       |
| O71 - C71 - O71 | 5.0780000                 | 129.92000 | C75 - C74 - C72 - H72 | 0.00703640 | 3 | 360   | 0.0       |
| C72 - C74 - H74 | 2.0952500                 | 110.33000 | H74 - C74 - C72 - N73 | 0.00005403 | 6 | 180   | 0.0       |
| C72 - N73 - H73 | 3.1083500                 | 106.11000 | H74 - C74 - C72 - N76 | 0.00005403 | 6 | 180   | 0.0       |
| C72 - N76 - H76 | 3.1083500                 | 106.11000 | O71 - C71 - C72 - N73 | 0.00005403 | 6 | 180   | 0.0       |
| C72 - C74 - C75 | 1.5441000                 | 114.33000 | O71 - C71 - C72 - N76 | 0.00005403 | 6 | 180   | 0.0       |
| H72 - C72 - N73 | 1.5303500                 | 111.73000 | H72 - C72 - C71 - O71 | 0.00005403 | 6 | 180   | 0.0       |
| H72 - C72 - N76 | 1.5303500                 | 111.73000 | C74 - C72 - C71 - O71 | 0.00005403 | 6 | 180   | 0.0       |
| H72 - C72 - C74 | 1.9992000                 | 109.26000 | C72 - C74 - C75 - O75 | 0.00005403 | 6 | 180   | 0.0       |
| N73 - C72 - C74 | 1.5441000                 | 114.70000 | O75 - C75 - C74 - H74 | 0.00005403 | 6 | 180   | 0.0       |
| H73 - N73 - H73 | 1.6219500                 | 105.67000 | C71 - C72 - N73 - H73 | 0.00703640 | 3 | 360   | 0.0       |
| N76 - C72 - C74 | 1.5441000                 | 114.70000 | C71 - C72 - N76 - H76 | 0.00703640 | 3 | 360   | 0.0       |
| H76 - N76 - H76 | 1.6219500                 | 105.67000 | H73 - N73 - C72 - H72 | 0.00703640 | 3 | 360   | 0.0       |
| C74 - C75 - O75 | 2.8160500                 | 115.04000 | H76 - N76 - C72 - H72 | 0.00703640 | 3 | 360   | 0.0       |
| H74 - C74 - C75 | 1.9992000                 | 107.26000 | H73 - N73 - C72 - C74 | 0.00703640 | 3 | 360   | 0.0       |
| H74 - C74 - H74 | 1.5441000                 | 106.05000 | H76 - N76 - C72 - C74 | 0.00703640 | 3 | 360   | 0.0       |
| O75 - C75 - O75 | 5.0780000                 | 129.92000 |                       |            |   |       |           |

**Table 3** Force field parameters for the interactions between aspartic acid species and calcium (Equations 5 and 6). Labels as in Figure 1

| Buckingham | $A$ [eV]  | $\rho$ [Å] | $C$ [eV Å <sup>6</sup> ] | A-B Lennard-Jones | $A$ [eV Å <sup>6</sup> ] | $B$ [eV Å <sup>12</sup> ] |
|------------|-----------|------------|--------------------------|-------------------|--------------------------|---------------------------|
| Ca - O71   | 2388.4841 | 0.271511   | 0.                       | Ca - C72          | 12000.0                  | 0.0                       |
| Ca - O75   | 2388.4841 | 0.271511   | 0.                       | Ca - C74          | 12000.0                  | 0.0                       |
| Ca - N73   | 22878.8   | 0.215023   | 0.                       |                   |                          |                           |

**Table 4** Force field parameters for the 12-6 Lennard-Jones interactions, as in Equation 7. Labels as in Figure 1; for water-Asp interactions only, O71a and O75a refer to Asp ZW<sup>-</sup>, and O71b and O75b refer to Asp<sup>2-</sup>.

|                | $\epsilon$ [eV] | $\sigma$ [Å] |                                        | $\epsilon$ [eV] | $\sigma$ [Å] |
|----------------|-----------------|--------------|----------------------------------------|-----------------|--------------|
| <b>Asp-Asp</b> |                 |              | <b>water-Asp</b>                       |                 |              |
| C71 - C71      | 0.00288         | 3.58118      | O2 - C71                               | 0.00440         | 3.36701      |
| C71 - C72      | 0.00288         | 3.58118      | O2 - C72                               | 0.00440         | 3.36701      |
| C71 - C74      | 0.00288         | 3.58118      | O2 - C74                               | 0.00440         | 3.36701      |
| C71 - C75      | 0.00288         | 3.58118      | O2 - C75                               | 0.00440         | 3.36701      |
| C71 - H72      | 0.00188         | 2.91541      | O2 - H72                               | 0.00288         | 2.74105      |
| C71 - H74      | 0.00188         | 2.91541      | O2 - H74                               | 0.00288         | 2.74105      |
| C71 - N73      | 0.00437         | 3.35146      | O2 - N73                               | 0.00332         | 3.47115      |
| C71 - N76      | 0.00437         | 3.35146      | O2 - N76                               | 0.00332         | 3.47115      |
| C71 - O71      | 0.00717         | 3.06654      | O2 - O71a                              | 0.00513         | 3.27240      |
| C71 - O75      | 0.00717         | 3.06654      | O2 - O75a                              | 0.00513         | 3.27240      |
| C72 - C72      | 0.00288         | 3.58118      | O2 - O71b                              | 0.00513         | 3.17240      |
| C72 - C74      | 0.00288         | 3.58118      | O2 - O75b                              | 0.00513         | 3.17240      |
| C72 - C75      | 0.00288         | 3.58118      | H2 - H76                               | 0.00123         | 2.45000      |
| C72 - H72      | 0.00188         | 2.91541      |                                        |                 |              |
| C72 - H74      | 0.00188         | 2.91541      | <b>CO<sub>3</sub><sup>2-</sup>-Asp</b> |                 |              |
| C72 - N73      | 0.00437         | 3.35146      | C4 - H74                               | 0.00188         | 2.91541      |
| C72 - N76      | 0.00437         | 3.35146      | C4 - N73                               | 0.00437         | 3.35146      |
| O71 - C72      | 0.00717         | 3.06654      | C4 - N76                               | 0.00437         | 3.35146      |
| C72 - O75      | 0.00717         | 3.06654      | O4 - C72                               | 0.00717         | 3.06654      |
| C74 - C74      | 0.00288         | 3.58118      | O4 - H72                               | 0.00468         | 2.49644      |
| C74 - C75      | 0.00288         | 3.58118      | O4 - C74                               | 0.00717         | 3.06654      |
| H72 - C74      | 0.00188         | 2.91541      | O4 - H74                               | 0.00468         | 2.49644      |
| C74 - H74      | 0.00188         | 2.91541      | O4 - N73                               | 0.00152         | 3.98580      |
| N73 - C74      | 0.00437         | 3.35146      | O4 - N76                               | 0.00152         | 3.98580      |
| N76 - C74      | 0.00437         | 3.35146      | C4 - C72                               | 0.00288         | 3.58118      |
| O71 - C74      | 0.00717         | 3.06654      | C4 - C71                               | 0.00288         | 3.58118      |
| C74 - O75      | 0.00717         | 3.06654      | O4 - O71                               | 0.01788         | 2.62585      |
| C75 - C75      | 0.00288         | 3.58118      | O4 - O75                               | 0.01788         | 2.62585      |
| H72 - C75      | 0.00188         | 2.91541      | C4 - C72                               | 0.00288         | 3.58118      |
| H74 - C75      | 0.00188         | 2.91541      | C4 - H72                               | 0.00188         | 2.91541      |
| N73 - C75      | 0.00437         | 3.35146      | C4 - C74                               | 0.00288         | 3.58118      |
| N76 - C75      | 0.00437         | 3.35146      |                                        |                 |              |
| O71 - C75      | 0.00717         | 3.06654      |                                        |                 |              |
| C75 - O75      | 0.00717         | 3.06654      |                                        |                 |              |
| H72 - H72      | 0.00123         | 2.37341      |                                        |                 |              |
| H72 - H74      | 0.00123         | 2.37341      |                                        |                 |              |
| H72 - N73      | 0.00285         | 2.72839      |                                        |                 |              |
| H72 - N76      | 0.00285         | 2.72839      |                                        |                 |              |
| O71 - H72      | 0.00468         | 2.49644      |                                        |                 |              |
| H72 - O75      | 0.00468         | 2.49644      |                                        |                 |              |
| H74 - H74      | 0.00123         | 2.37341      |                                        |                 |              |
| N73 - H74      | 0.00285         | 2.72839      |                                        |                 |              |
| N76 - H74      | 0.00285         | 2.72839      |                                        |                 |              |
| O71 - H74      | 0.00468         | 2.49644      |                                        |                 |              |
| H74 - O75      | 0.00468         | 2.49644      |                                        |                 |              |
| N73 - N73      | 0.00663         | 3.13647      |                                        |                 |              |
| N76 - N76      | 0.00663         | 3.13647      |                                        |                 |              |
| O71 - N73      | 0.00152         | 3.98580      |                                        |                 |              |
| O71 - N76      | 0.00152         | 3.98580      |                                        |                 |              |
| N73 - O75      | 0.00152         | 3.98580      |                                        |                 |              |
| N76 - O75      | 0.00152         | 3.98580      |                                        |                 |              |
| O71 - O71      | 0.01788         | 2.62585      |                                        |                 |              |
| O71 - O75      | 0.01788         | 2.62585      |                                        |                 |              |
| O75 - O75      | 0.01788         | 2.62585      |                                        |                 |              |

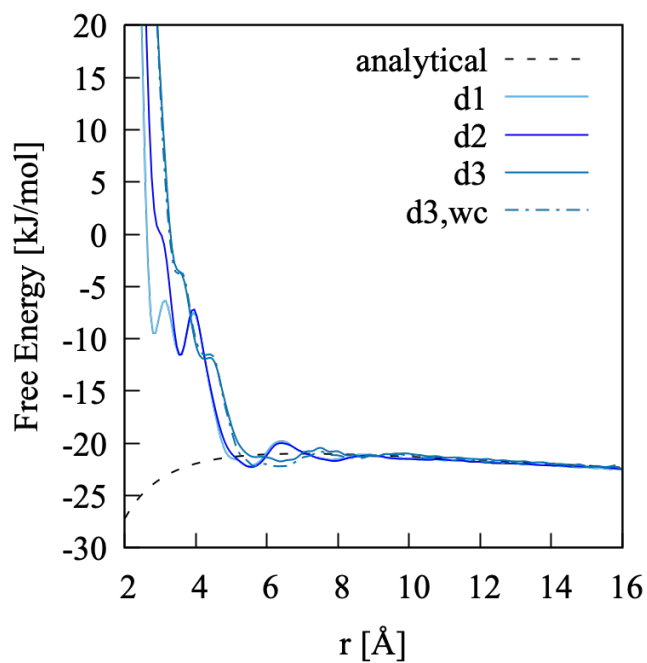

**Fig. 2** Pairing free energy of Ca-Asp ZW<sup>-</sup> along distances (Ca-O71), d2 (Ca-O75), d3 (Ca-COM, where COM is the centre of mass of Asp ZW<sup>-</sup>) and d3,wc (d3 with water coordination of calcium as a collective variable).

## References

- 1 P. Raiteri, R. Demichelis and J. D. Gale, *J. Phys. Chem. C*, 2015, **119**, 24447–24458.
- 2 Y. Wu, H. L. Tepper and G. A. Voth, *The Journal of Chemical Physics*, 2006, **124**, 024503.
